# Supplementary material for: Unbiased proteomic analysis of extracellular vesicles secreted by senescent human vascular smooth muscle cells reveals their ability to modulate immune cell functions
Source: PubMed Central journal article supplement (PMC9768090; doi:10.1007/s11357-022-00625-0), 2022-07-28
Supplement: 11357_2022_625_MOESM2_ESM.pdf [file 11357_2022_625_MOESM2_ESM.pdf]

**Table Supplementary 7** ClueGO Gene Ontology Biological Process SIPS up EVs

| Gene Ontology Pathways (ID/term)                                                                     | Proteins                                                                                                                                                                                                                                                                                                                                                                                   |
|------------------------------------------------------------------------------------------------------|--------------------------------------------------------------------------------------------------------------------------------------------------------------------------------------------------------------------------------------------------------------------------------------------------------------------------------------------------------------------------------------------|
| GO:0002263 cell activation involved in immune response                                               | [ALDOC, ANPEP, C3, CAPN1, CCT2, CKAP4, CLU, CTSB, DSC1, DYNC1H1, DYNC1LI1, FTH1, FTL, GLB1, GSN, HBB, LRP1, MME, PFKL, PGM1, PKM, PSMC2, PSMD1, PSMD12, PTX3, PXDN, PYGL, RAB6A, SNX6, TUBB, VAT1, XRCC6]                                                                                                                                                                                  |
| GO:0002274 myeloid leukocyte activation                                                              | [ALDOC, ANPEP, C3, CAPN1, CCT2, CKAP4, CLU, CTSB, DSC1, DYNC1H1, DYNC1LI1, FTH1, FTL, GLB1, GSN, HBB, MME, NECTIN2, PFKL, PGM1, PKM, PSMC2, PSMD1, PSMD12, PTX3, PXDN, PYGL, RAB6A, SNX6, THBS1, TUBB, VAT1, WNT5A, XRCC6]                                                                                                                                                                 |
| GO:0002444 myeloid leukocyte mediated immunity                                                       | [ALDOC, ANPEP, C3, CAPN1, CCT2, CKAP4, CLU, CTSB, DSC1, DYNC1H1, DYNC1LI1, FTH1, FTL, GLB1, GSN, HBB, MME, PFKL, PGM1, PKM, PSMC2, PSMD1, PSMD12, PTX3, PXDN, PYGL, RAB6A, SNX6, TUBB, VAT1, XRCC6]                                                                                                                                                                                        |
| GO:0032940 secretion by cell                                                                         | [A2M, ACTN1, AIMP1, ALDOC, ANPEP, C1QTNF3, C3, CAPN1, CCT2, CKAP4, CLU, COMP, COP55, CTSB, DPP4, DSC1, DYNC1H1, DYNC1LI1, F5, FGB, FLNA, FTH1, FTL, GAS6, GLB1, GSN, HBB, ITGB3, KIF5B, LHFPL2, LRP1, MME, NSF, PDCD6IP, PFKL, PFKM, PGM1, PKM, PLG, PSMC2, PSMD1, PSMD12, PTX3, PXDN, PYGL, RAB6A, SEPTIN2, SERPINE1, SIRT3, SNX6, SPARC, THBS1, TLN1, TSG101, TUBA4A, TUBB, VAT1, XRCC6] |
| GO:0002275 myeloid cell activation involved in immune response                                       | [ALDOC, ANPEP, C3, CAPN1, CCT2, CKAP4, CLU, CTSB, DSC1, DYNC1H1, DYNC1LI1, FTH1, FTL, GLB1, GSN, HBB, MME, PFKL, PGM1, PKM, PSMC2, PSMD1, PSMD12, PTX3, PXDN, PYGL, RAB6A, SNX6, TUBB, VAT1, XRCC6]                                                                                                                                                                                        |
| GO:0006887 exocytosis                                                                                | [A2M, ACTN1, ALDOC, ANPEP, C3, CAPN1, CCT2, CKAP4, CLU, COP55, CTSB, DSC1, DYNC1H1, DYNC1LI1, F5, FGB, FLNA, FTH1, FTL, GAS6, GLB1, GSN, HBB, ITGB3, LHFPL2, MME, NSF, PDCD6IP, PFKL, PGM1, PKM, PLG, PSMC2, PSMD1, PSMD12, PTX3, PXDN, PYGL, RAB6A, SEPTIN2, SERPINE1, SNX6, SPARC, THBS1, TLN1, TSG101, TUBA4A, TUBB, VAT1, XRCC6]                                                       |
| GO:0036230 granulocyte activation                                                                    | [ALDOC, ANPEP, C3, CAPN1, CCT2, CKAP4, CLU, CTSB, DSC1, DYNC1H1, DYNC1LI1, FTH1, FTL, GLB1, GSN, HBB, MME, PFKL, PGM1, PKM, PSMC2, PSMD1, PSMD12, PTX3, PXDN, PYGL, RAB6A, TUBB, VAT1, XRCC6]                                                                                                                                                                                              |
| GO:0002446 neutrophil mediated immunity                                                              | [ALDOC, ANPEP, C3, CAPN1, CCT2, CKAP4, CLU, CTSB, DSC1, DYNC1H1, DYNC1LI1, FTH1, FTL, GLB1, GSN, HBB, MME, PFKL, PGM1, PKM, PSMC2, PSMD1, PSMD12, PTX3, PXDN, PYGL, RAB6A, TUBB, VAT1, XRCC6]                                                                                                                                                                                              |
| GO:0042119 neutrophil activation                                                                     | [ALDOC, ANPEP, C3, CAPN1, CCT2, CKAP4, CLU, CTSB, DSC1, DYNC1H1, DYNC1LI1, FTH1, FTL, GLB1, GSN, HBB, MME, PFKL, PGM1, PKM, PSMC2, PSMD1, PSMD12, PTX3, PXDN, PYGL, RAB6A, TUBB, VAT1, XRCC6]                                                                                                                                                                                              |
| GO:0043299 leukocyte degranulation                                                                   | [ALDOC, ANPEP, C3, CAPN1, CCT2, CKAP4, CLU, CTSB, DSC1, DYNC1H1, DYNC1LI1, FTH1, FTL, GLB1, GSN, HBB, MME, PFKL, PGM1, PKM, PSMC2, PSMD1, PSMD12, PTX3, PXDN, PYGL, RAB6A, SNX6, TUBB, VAT1, XRCC6]                                                                                                                                                                                        |
| GO:0045055 regulated exocytosis                                                                      | [A2M, ACTN1, ALDOC, ANPEP, C3, CAPN1, CCT2, CKAP4, CLU, CTSB, DSC1, DYNC1H1, DYNC1LI1, F5, FGB, FLNA, FTH1, FTL, GAS6, GLB1, GSN, HBB, ITGB3, LHFPL2, MME, PFKL, PGM1, PKM, PLG, PSMC2, PSMD1, PSMD12, PTX3, PXDN, PYGL, RAB6A, SERPINE1, SNX6, SPARC, THBS1, TLN1, TUBA4A, TUBB, VAT1, XRCC6]                                                                                             |
| GO:0002283 neutrophil activation involved in immune response                                         | [ALDOC, ANPEP, C3, CAPN1, CCT2, CKAP4, CLU, CTSB, DSC1, DYNC1H1, DYNC1LI1, FTH1, FTL, GLB1, GSN, HBB, MME, PFKL, PGM1, PKM, PSMC2, PSMD1, PSMD12, PTX3, PXDN, PYGL, RAB6A, TUBB, VAT1, XRCC6]                                                                                                                                                                                              |
| GO:0002576 platelet degranulation                                                                    | [A2M, ACTN1, CLU, F5, FGB, FLNA, GAS6, ITGB3, LHFPL2, PLG, SERPINE1, SPARC, THBS1, TLN1, TUBA4A]                                                                                                                                                                                                                                                                                           |
| GO:0043312 neutrophil degranulation                                                                  | [ALDOC, ANPEP, C3, CAPN1, CCT2, CKAP4, CLU, CTSB, DSC1, DYNC1H1, DYNC1LI1, FTH1, FTL, GLB1, GSN, HBB, MME, PFKL, PGM1, PKM, PSMC2, PSMD1, PSMD12, PTX3, PXDN, PYGL, RAB6A, TUBB, VAT1, XRCC6]                                                                                                                                                                                              |
| GO:0002504 antigen processing and presentation of peptide or polysaccharide antigen via MHC class II | [ACTR1A, AP2B1, CLTC, DCTN1, DCTN2, DN2M, DYNC1H1, DYNC1LI1, DYNC1LI2, KLC1, SEC31A, THBS1]                                                                                                                                                                                                                                                                                                |

|            |                                                                                   |                                                                                                                                                         |
|------------|-----------------------------------------------------------------------------------|---------------------------------------------------------------------------------------------------------------------------------------------------------|
| GO:0019884 | antigen processing and presentation of exogenous antigen                          | [ACTR1A, AP2B1, CLTC, DCTN1, DCTN2, DNM2, DYNC1H1, DYNC1LI1, DYNC1LI2, KLC1, PSMB8, PSMC2, PSMC5, PSMD1, PSMD12, SEC31A]                                |
| GO:0042180 | cellular ketone metabolic process                                                 | [AFP, AKR1B1, APOA4, APOC3, HSD17B10, NQO1, PSMB8, PSMC2, PSMC5, PSMD1, PSMD12]                                                                         |
| GO:0048002 | antigen processing and presentation of peptide antigen                            | [ACTR1A, AP2B1, CLTC, DCTN1, DCTN2, DNM2, DYNC1H1, DYNC1LI1, DYNC1LI2, KLC1, PSMB8, PSMC2, PSMC5, PSMD1, PSMD12, SEC31A]                                |
| GO:0007164 | establishment of tissue polarity                                                  | [AP2B1, CLTC, CTHRC1, PSMB8, PSMC2, PSMC5, PSMD1, PSMD12, WNT5A]                                                                                        |
| GO:0140056 | organelle localization by membrane tethering                                      | [ACTR1A, DCTN1, DCTN2, DYNC1H1, MAPRE1, NSF, TUBA1A, TUBA4A, TUBB, USO1]                                                                                |
| GO:0002478 | antigen processing and presentation of exogenous peptide antigen                  | [ACTR1A, AP2B1, CLTC, DCTN1, DCTN2, DNM2, DYNC1H1, DYNC1LI1, DYNC1LI2, KLC1, PSMB8, PSMC2, PSMC5, PSMD1, PSMD12, SEC31A]                                |
| GO:0002495 | antigen processing and presentation of peptide antigen via MHC class II           | [ACTR1A, AP2B1, CLTC, DCTN1, DCTN2, DNM2, DYNC1H1, DYNC1LI1, DYNC1LI2, KLC1, SEC31A]                                                                    |
| GO:0032103 | positive regulation of response to external stimulus                              | [C3, CDH13, FLNA, GAS6, HSPB1, LRP1, NECTIN2, OXSR1, PDGFRB, PLG, PSMB8, PSMC2, PSMC5, PSMD1, PSMD12, SERPINE1, TGM2, THBS1, THBS4, TPBG, WNT5A, XRCC6] |
| GO:0048193 | Golgi vesicle transport                                                           | [ACTR1A, CLTC, COPZ1, DCTN1, DCTN2, DNM2, DYNC1H1, DYNC1LI1, DYNC1LI2, F5, FTH1, FTL, GAS6, KLC1, NSF, RAB6A, SEC31A, SNX3, TFG, USO1]                  |
| GO:0006520 | cellular amino acid metabolic process                                             | [AHCY, AIMP1, GARS1, GFPT1, GOLT1B, HSD17B10, IARS1, MTHFD1, NQO1, PSMB8, PSMC2, PSMC5, PSMD1, PSMD12, VARS1]                                           |
| GO:0044839 | cell cycle G2/M phase transition                                                  | [ACTR1A, DCTN1, DCTN2, DNM2, DYNC1H1, MAPRE1, PPP1CB, PSMB8, PSMC2, PSMC5, PSMD1, PSMD12, TUBA1A, TUBA4A, TUBB]                                         |
| GO:0006888 | endoplasmic reticulum to Golgi vesicle-mediated transport                         | [ACTR1A, COPZ1, DCTN1, DCTN2, DYNC1H1, DYNC1LI1, DYNC1LI2, F5, GAS6, NSF, SEC31A, TFG, USO1]                                                            |
| GO:0019886 | antigen processing and presentation of exogenous peptide antigen via MHC class II | [ACTR1A, AP2B1, CLTC, DCTN1, DCTN2, DNM2, DYNC1H1, DYNC1LI1, DYNC1LI2, KLC1, SEC31A]                                                                    |
| GO:0038061 | NIK/NF-kappaB signaling                                                           | [C1QTNF3, GREM1, ILK, PSMB8, PSMC2, PSMC5, PSMD1, PSMD12, TNFRSF10B]                                                                                    |
| GO:0000086 | G2/M transition of mitotic cell cycle                                             | [ACTR1A, DCTN1, DCTN2, DNM2, DYNC1H1, MAPRE1, PPP1CB, PSMB8, PSMC2, PSMC5, PSMD1, PSMD12, TUBA1A, TUBA4A, TUBB]                                         |
| GO:0001736 | establishment of planar polarity                                                  | [AP2B1, CLTC, CTHRC1, PSMB8, PSMC2, PSMC5, PSMD1, PSMD12, WNT5A]                                                                                        |
| GO:0001738 | morphogenesis of a polarized epithelium                                           | [AP2B1, CLTC, CTHRC1, FAT1, PSMB8, PSMC2, PSMC5, PSMD1, PSMD12, WNT5A]                                                                                  |
| GO:0006521 | regulation of cellular amino acid metabolic process                               | [NQO1, PSMB8, PSMC2, PSMC5, PSMD1, PSMD12]                                                                                                              |
| GO:2000027 | regulation of animal organ morphogenesis                                          | [AKR1B1, AP2B1, CLTC, CTHRC1, GREM1, PSMB8, PSMC2, PSMC5, PSMD1, PSMD12, TNFRSF11B, WNT5A]                                                              |
| GO:0097711 | ciliary basal body-plasma membrane docking                                        | [ACTR1A, DCTN1, DCTN2, DYNC1H1, MAPRE1, TUBA1A, TUBA4A, TUBB]                                                                                           |
| GO:1902749 | regulation of cell cycle G2/M phase transition                                    | [ACTR1A, DCTN1, DCTN2, DYNC1H1, MAPRE1, PSMB8, PSMC2, PSMC5, PSMD1, PSMD12, TUBA1A, TUBA4A, TUBB]                                                       |

|            |                                                        |                                                                                                   |
|------------|--------------------------------------------------------|---------------------------------------------------------------------------------------------------|
| GO:0030178 | negative regulation of Wnt signaling pathway           | [CTHRC1, GREM1, LRP1, PSMB8, PSMC2, PSMC5, PSMD1, PSMD12, RUVBL2, TPBG, WNT5A]                    |
| GO:0035567 | non-canonical Wnt signaling pathway                    | [AP2B1, CLTC, CTHRC1, PSMB8, PSMC2, PSMC5, PSMD1, PSMD12, WNT5A]                                  |
| GO:0090175 | regulation of establishment of planar polarity         | [AP2B1, CLTC, CTHRC1, PSMB8, PSMC2, PSMC5, PSMD1, PSMD12, WNT5A]                                  |
| GO:0010389 | regulation of G2/M transition of mitotic cell cycle    | [ACTR1A, DCTN1, DCTN2, DYNC1H1, MAPRE1, PSMB8, PSMC2, PSMC5, PSMD1, PSMD12, TUBA1A, TUBA4A, TUBB] |
| GO:0060071 | Wnt signaling pathway, planar cell polarity pathway    | [AP2B1, CLTC, CTHRC1, PSMB8, PSMC2, PSMC5, PSMD1, PSMD12, WNT5A]                                  |
| GO:0090090 | negative regulation of canonical Wnt signaling pathway | [CTHRC1, GREM1, PSMB8, PSMC2, PSMC5, PSMD1, PSMD12, RUVBL2, TPBG, WNT5A]                          |
