# Supplementary material for: Unbiased proteomic analysis of extracellular vesicles secreted by senescent human vascular smooth muscle cells reveals their ability to modulate immune cell functions
Source: PubMed Central journal article supplement (PMC9768090; doi:10.1007/s11357-022-00625-0), 2022-07-28
Supplement: 11357_2022_625_MOESM3_ESM.pdf [file 11357_2022_625_MOESM3_ESM.pdf]

**Table Supplementary 8** ClueGO Gene Ontology Biological Process RS up EVs.

| Gene Ontology Pathways (ID/term)                                                                     | Proteins                                                                         |
|------------------------------------------------------------------------------------------------------|----------------------------------------------------------------------------------|
| GO:0098760 response to interleukin-7                                                                 | [P4HB, PDIA3, RAD23B, STIP1]                                                     |
| GO:0098761 cellular response to interleukin-7                                                        | [P4HB, PDIA3, RAD23B, STIP1]                                                     |
| GO:0070671 response to interleukin-12                                                                | [HNRNPA2B1, HSPA9, P4HB, SOD2, TALDO1]                                           |
| GO:0035722 interleukin-12-mediated signaling pathway                                                 | [HNRNPA2B1, HSPA9, P4HB, SOD2, TALDO1]                                           |
| GO:0071349 cellular response to interleukin-12                                                       | [HNRNPA2B1, HSPA9, P4HB, SOD2, TALDO1]                                           |
| GO:0002504 antigen processing and presentation of peptide or polysaccharide antigen via MHC class II | [ACTR1A, CANX, CLTC, CTSD, DCTN1, DYNC1H1, DYNC1LI2, THBS1]                      |
| GO:0019884 antigen processing and presentation of exogenous antigen                                  | [ACTR1A, CALR, CANX, CLTC, CTSD, DCTN1, DYNC1H1, DYNC1LI2, PDIA3, PSMD4, SEC22B] |
| GO:0048002 antigen processing and presentation of peptide antigen                                    | [ACTR1A, CALR, CANX, CLTC, CTSD, DCTN1, DYNC1H1, DYNC1LI2, PDIA3, PSMD4, SEC22B] |
| GO:0002478 antigen processing and presentation of exogenous peptide antigen                          | [ACTR1A, CALR, CANX, CLTC, CTSD, DCTN1, DYNC1H1, DYNC1LI2, PDIA3, PSMD4, SEC22B] |
| GO:0002495 antigen processing and presentation of peptide antigen via MHC class II                   | [ACTR1A, CANX, CLTC, CTSD, DCTN1, DYNC1H1, DYNC1LI2]                             |
| GO:0019886 antigen processing and presentation of exogenous peptide antigen via MHC class II         | [ACTR1A, CANX, CLTC, CTSD, DCTN1, DYNC1H1, DYNC1LI2]                             |
