# Supplementary material for: Unbiased proteomic analysis of extracellular vesicles secreted by senescent human vascular smooth muscle cells reveals their ability to modulate immune cell functions
Source: PubMed Central journal article supplement (PMC9768090; doi:10.1007/s11357-022-00625-0), 2022-07-28
Supplement: 11357_2022_625_MOESM4_ESM.pdf [file 11357_2022_625_MOESM4_ESM.pdf]

**Table S9** Comparison of proteins identified in the secretome (EVs and sSASP) of VSMCs and fibroblasts and epithelial cells (SASP Atlas data); (**bold font** –  $p < 0.001$ ; ↑ higher level in VSMC)

H<sub>2</sub>O<sub>2</sub> – hydrogen peroxide induced senescence, IR – X radiation induced senescence, RS – replicative senescence,

**Proteins common for EVs from H<sub>2</sub>O<sub>2</sub> VSMC, RS VSMC, IR fibroblasts**

| H <sub>2</sub> O <sub>2</sub> VSMC – IR fibro |                              | H <sub>2</sub> O <sub>2</sub> VSMC– RS VSMC– IR fibro |                                           |                | RS VSMC– IR fibro |                              |
|-----------------------------------------------|------------------------------|-------------------------------------------------------|-------------------------------------------|----------------|-------------------|------------------------------|
| Protein ID                                    | fold change log <sub>2</sub> | Protein ID                                            | fold change H <sub>2</sub> O <sub>2</sub> | fold change RS | Protein ID        | fold change log <sub>2</sub> |
| WNT5A                                         | 3,34 ↑                       | SERPINF1                                              | 2,67 ↑                                    | 1,74 ↑         | CALR              | 0,75                         |
| A2M                                           | <b>1,81</b>                  | THBS1                                                 | <b>0,81</b>                               | <b>1,54</b>    | COL4A2            | 0,75                         |
| FBLN1                                         | 1,2                          | GPX1                                                  | 0,46                                      | 0,41           | <b>PDIA3</b>      | 0,71                         |
| CLU                                           | 0,9                          | PLOD1                                                 | 0,4                                       | <b>0,47</b>    | <b>P4HB</b>       | 0,68                         |
| ITIH2                                         | 0,84                         | TNC                                                   | 0,44                                      | 0,41           | <b>FKBP10</b>     | 0,67                         |
| POSTN                                         | 0,6                          | LRP1                                                  | 0,18                                      | <b>0,3</b>     | <b>HSPA5</b>      | 0,6                          |
| <b>COL12A1</b>                                | 0,57                         | <b>CLTC</b>                                           | <b>0,16</b>                               | <b>0,29</b>    |                   |                              |
| PTX3                                          | 0,55                         |                                                       |                                           |                |                   |                              |
| PXDN                                          | 0,53                         |                                                       |                                           |                |                   |                              |
| ACTN1                                         | 0,53                         |                                                       |                                           |                |                   |                              |
| GREM1                                         | 0,41                         |                                                       |                                           |                |                   |                              |
| <b>LCAT</b>                                   | 0,36                         |                                                       |                                           |                |                   |                              |
| <b>COL1A2</b>                                 | 0,35                         |                                                       |                                           |                |                   |                              |
| <b>C1R</b>                                    | 0,34                         |                                                       |                                           |                |                   |                              |
| <b>GFPT1</b>                                  | 0,34                         |                                                       |                                           |                |                   |                              |
| <b>C1S</b>                                    | 0,33                         |                                                       |                                           |                |                   |                              |
| <b>TGFBI</b>                                  | 0,3                          |                                                       |                                           |                |                   |                              |
| <b>IARS</b>                                   | 0,2                          |                                                       |                                           |                |                   |                              |
| <b>EMILIN1</b>                                | 0,18                         |                                                       |                                           |                |                   |                              |
| <b>RUVBL2</b>                                 | 0,09                         |                                                       |                                           |                |                   |                              |

**Proteins common for sSASP form H<sub>2</sub>O<sub>2</sub> VSMC, RS VSMC, IR fibroblasts, IR epithelial cells**

| H <sub>2</sub> O <sub>2</sub> VSMC – IR fibro – IR epi |                              | H <sub>2</sub> O <sub>2</sub> VSMC – RS VSMC – IR fibro |                                           |                | H <sub>2</sub> O <sub>2</sub> VSMC – RS VSMC – IR epi |                                           |                |
|--------------------------------------------------------|------------------------------|---------------------------------------------------------|-------------------------------------------|----------------|-------------------------------------------------------|-------------------------------------------|----------------|
| Protein ID                                             | fold change log <sub>2</sub> | Protein ID                                              | fold change H <sub>2</sub> O <sub>2</sub> | fold change RS | Protein ID                                            | fold change H <sub>2</sub> O <sub>2</sub> | fold change RS |
| <b>GDF15</b>                                           | 0,91                         | <b>IGFBP5</b>                                           | <b>1,47</b>                               | <b>2,71</b>    | ARSA                                                  | 2,31 ↑                                    | 2,77 ↑         |
|                                                        |                              | ALDOC                                                   | 1,06 -                                    | <b>2,13</b> ↑  |                                                       |                                           |                |

| H <sub>2</sub> O <sub>2</sub> VSMC – IR fibro |                                 | H <sub>2</sub> O <sub>2</sub> VSMC – IR epi |                                 | RS VSMC – IR fibro |                                 | RS VSMC – IR epi |                                 |
|-----------------------------------------------|---------------------------------|---------------------------------------------|---------------------------------|--------------------|---------------------------------|------------------|---------------------------------|
| Protein ID                                    | fold change<br>log <sub>2</sub> | Protein ID                                  | fold change<br>log <sub>2</sub> | Protein ID         | fold change<br>log <sub>2</sub> | Protein ID       | fold change<br>log <sub>2</sub> |
| <b>RBP4</b>                                   | 2,77                            | CAPNS1                                      | 2 ↑                             | <u>FN1</u>         | 4,03 ↑                          | ACTC1            | 2,78 ↑                          |
| <b>GC</b>                                     | 2,68 ↑                          | <b>TGM2</b>                                 | <b>1,99 ↑</b>                   | PLOD3              | 1,13                            | <u>ATP6V1B2</u>  | 1,85 ↑                          |
| <b>TGFBI</b>                                  | 2,25 ↑                          | PRDX3                                       | 0,96 ↑                          |                    |                                 | PPP2R1A          | 1,7 ↑                           |
| <b>CTGF</b>                                   | 2,2 ↑                           |                                             |                                 |                    |                                 |                  |                                 |
| <b>CTHRC1</b>                                 | 1,35 ↑                          |                                             |                                 |                    |                                 |                  |                                 |
| <b>GDI1</b>                                   | 0,72                            |                                             |                                 |                    |                                 |                  |                                 |
| <b>THBS1</b>                                  | 0,6                             |                                             |                                 |                    |                                 |                  |                                 |
| <b>TPI1</b>                                   | 0,59                            |                                             |                                 |                    |                                 |                  |                                 |
| <b>VCL</b>                                    | 0,2                             |                                             |                                 |                    |                                 |                  |                                 |
